# Supplementary material
Source: Springer Nature journal article supplement (https://www.springermedizin.de/resource/supplementary/13049_2010_184_MOESM2_ESM.pdf/9666054)
Supplement: MOESM2 [file 9666054]

Number of healthcare professionals  
at the two hospitals  
3144 persons

Absent 336 persons

Did not want to participate 33

Did not receive education 433

2342 persons answered the questionnaire.  
Percentage of answers 98 % of practically  
possible, 76 % of theoretically possible.
